# Supplementary material for: Optimizing PET Glycolysis with an Oyster Shell-Derived Catalyst Using Response Surface Methodology
Source: MDPI journal article supplement (doi:10.3390/polym14040656), 2022-02-09
Supplement: s1 [file s1]

# Optimizing PET Glycolysis with an Oyster Shell-Derived Catalyst Using Response Surface Methodology

Yonghwan Kim <sup>1,†</sup>, Minjun Kim <sup>2,†</sup>, Jeongwook Hwang <sup>1</sup>, Eunmi Im <sup>3</sup> and Geon Dae Moon <sup>3,\*</sup>

<sup>1</sup> Department of Advanced Materials R&D Center, Dae-II Corporation (DIC), Ulsan 44914, Korea; kyh871111@dicorp.co.kr (Y.K.); jwhwang@dicorp.co.kr (J.H.)

<sup>2</sup> RIKEN Center for Emergent Matter Science (CEMS), Saitama 351-0198, Japan; minjun.kim@riken.jp

<sup>3</sup> Dongnam Division, Korea Institute of Industrial Technology (KITECH), Busan 46938, Korea; eunmi47@kitech.re.kr

\* Correspondence: gmoon@kitech.re.kr

† These authors contributed equally to this work.

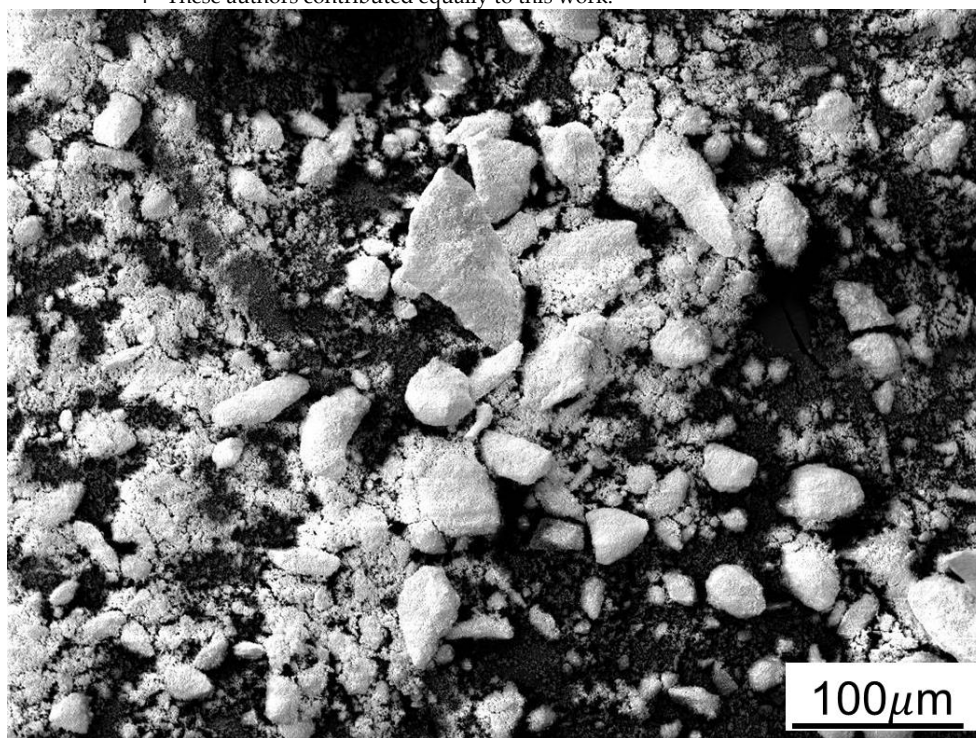

**Figure S1.** SEM image of uncalcinated oyster shell powder.

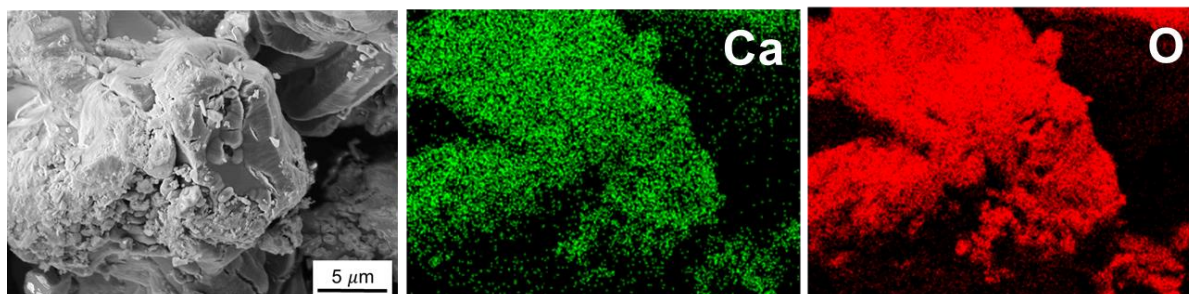

**Figure S2.** EDS elemental map over a single calcined oystershell particle.

**Table S1.** EDS results of calcined oyster shells

---

| Element | Wt%   |
|---------|-------|
| C       | 2.72  |
| O       | 25.97 |
| Na      | 0.25  |
| Mg      | 0.38  |
| Al      | 0.26  |
| Si      | 0.42  |
| Ca      | 69.99 |
| Total:  | 100   |

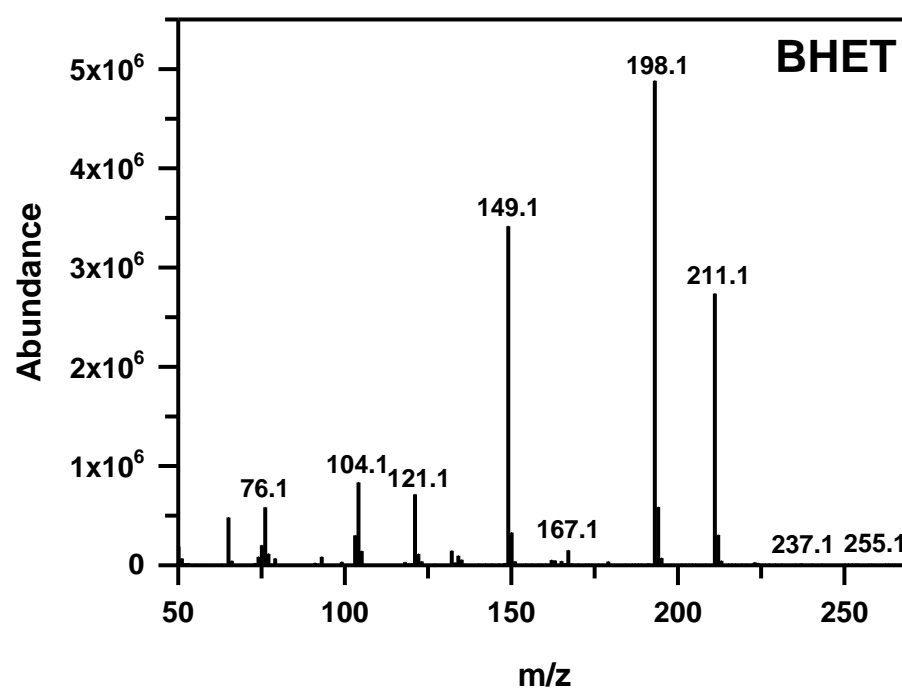

**Figure S3.** GC-MS spectrum of BHET.

**Table S2.** Characterization fragments of the glycolysis products in mass spectra.

| m/z | Fragments                                                                                  |
|-----|--------------------------------------------------------------------------------------------|
| 255 | $\text{HO}(\text{CH}_2)_2\text{OOC}\text{C}_6\text{H}_4\text{COO}(\text{CH}_2)_2\text{OH}$ |
| 237 | $\text{HO}(\text{CH}_2)_2\text{OOC}\text{C}_6\text{H}_4\text{COO}(\text{CH}_2)_2$          |
| 211 | $\text{HO}(\text{CH}_2)_2\text{OOC}\text{C}_6\text{H}_4\text{COOH}$                        |
| 193 | $\text{HOOC}\text{C}_6\text{H}_4\text{COO}(\text{CH}_2)_2$                                 |
| 167 | $\text{HOOC}\text{C}_6\text{H}_4\text{COOH}$                                               |
| 149 | $\text{HOOC}\text{C}_6\text{H}_4\text{CO}$                                                 |

|     |                                   |
|-----|-----------------------------------|
| 132 | $\text{OCC}_6\text{H}_4\text{CO}$ |
| 121 | $\text{HOCC}_6\text{H}_4$         |
| 104 | $\text{C}_6\text{H}_4\text{CO}$   |
| 76  | $\text{C}_6\text{H}_4$            |

---

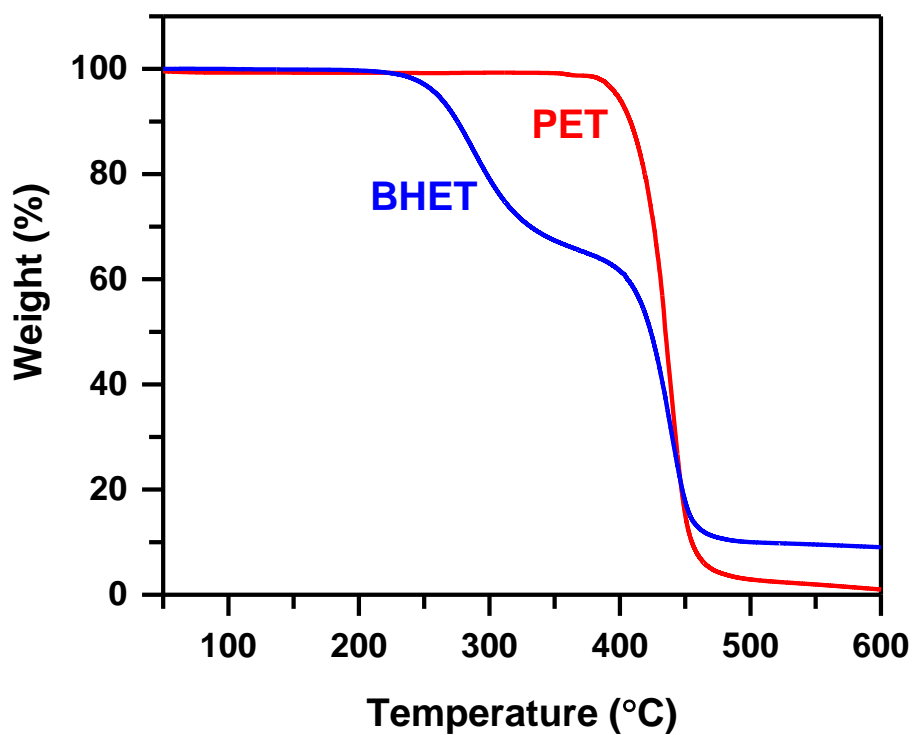

**Figure S4.** TGA curves of BHET product and PET waste.

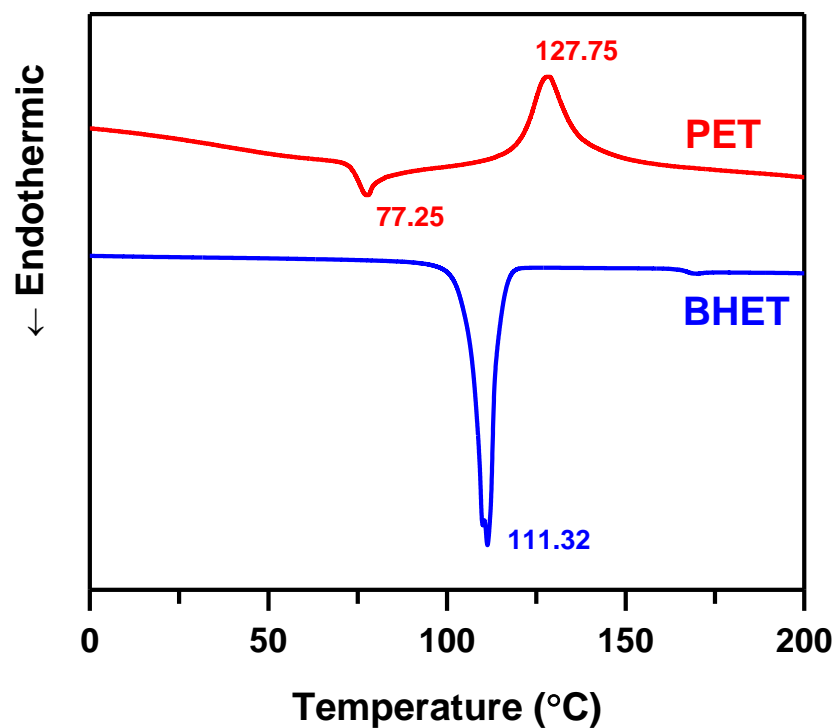

**Figure S5.** DSC curves of BHET product and PET waste.

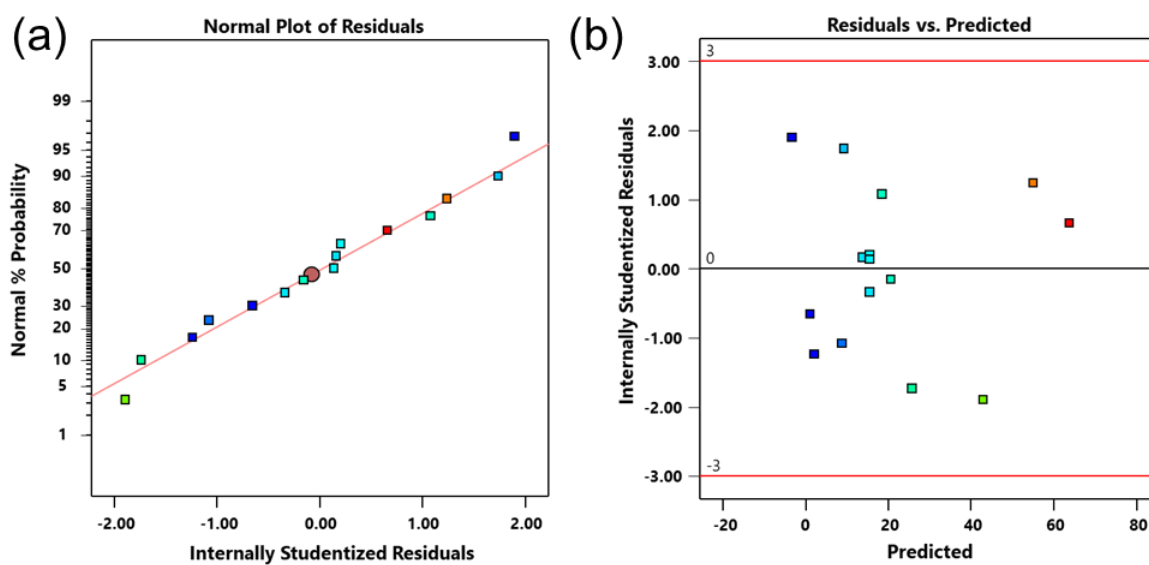

**Figure S6.** Residual plot of quadratic model: (a) Normal probability plot of the internally studentized residuals, (b) Scatter plot of the internally studentized residuals and predicted value.

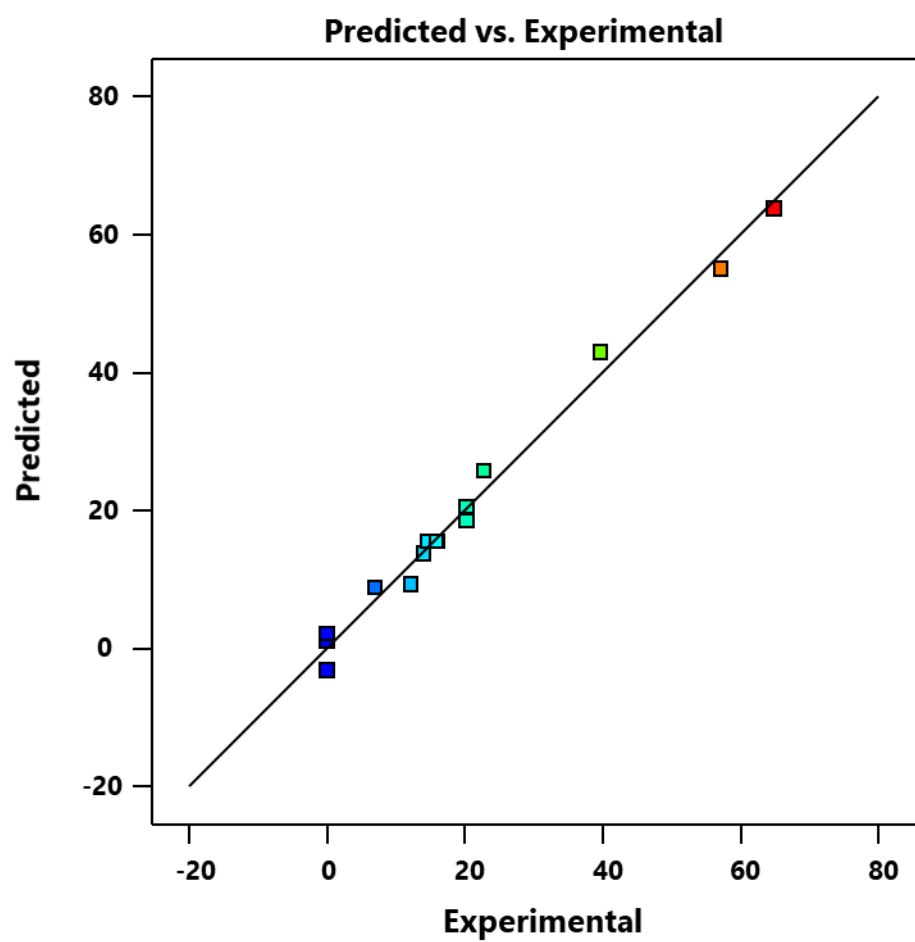

**Figure S7.** Plot of the actual and predicted value for yield of BHET.
